# Supplementary material for: Prevalence, Associated Factors, and Appropriateness of Empirical Treatment of Trichomoniasis, Bacterial Vaginosis, and Vulvovaginal Candidiasis among Women with Vaginitis
Source: PubMed Central journal article supplement (PMC10269550; doi:10.1128/spectrum.00161-23), 2023-04-13
Supplement: spectrum.00161-23-s0001.pdf [file spectrum.00161-23-s0001.pdf]

**Supplementary Figure S1.** Alluvial diagram illustrating the relationship between microbiological diagnosis and effectiveness of empirical antimicrobial treatment. (Abbreviations: BV, bacterial vaginosis; VVC, vulvovaginal candidiasis; TV, trichomoniasis) (Footnote: Asterisk marks indicate the specified infections with or without other co-infections)

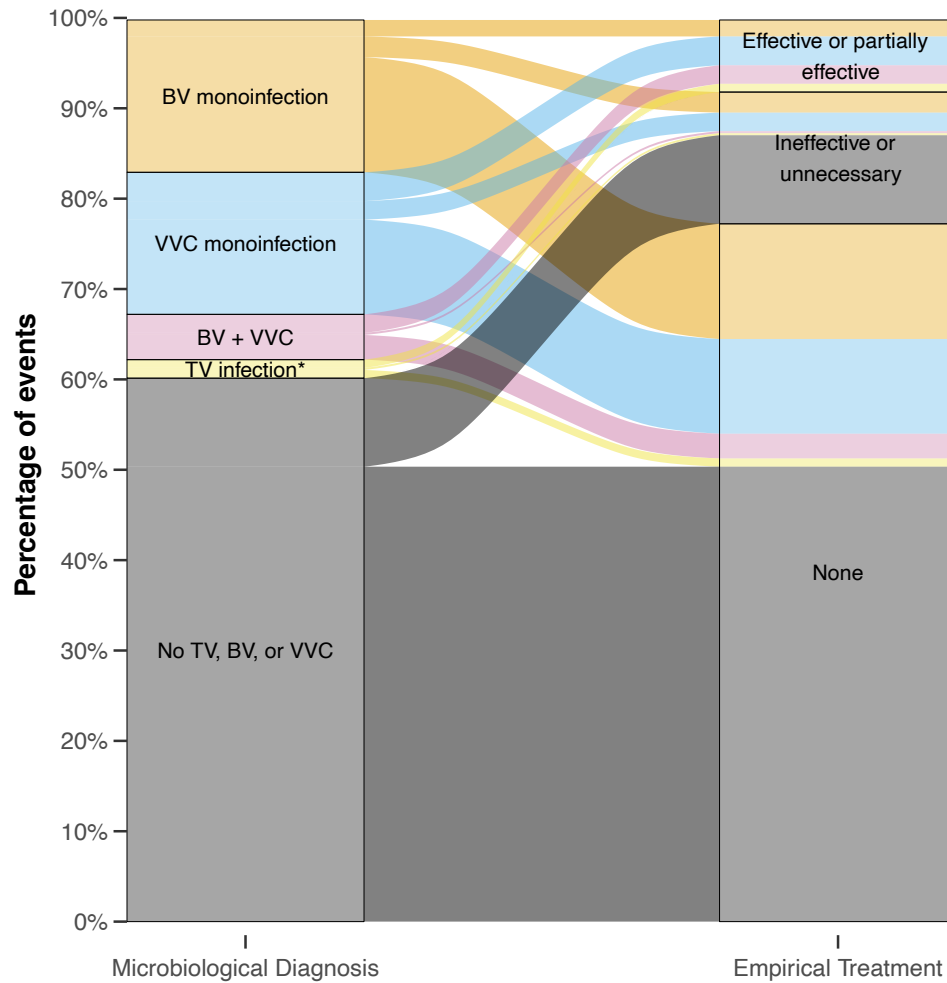

**Supplementary Figure S2.** Microbiological diagnosis and effectiveness of empirical antimicrobial treatment in (A) events with confirmed microbiological diagnosis (n = 152), and (B) events with empirical antifungal or metronidazole treatment (n = 60) after excluding events with gonorrhea, pelvic inflammatory disease, or urinary tract infection. (Abbreviations: BV, bacterial vaginosis; VVC, vulvovaginal candidiasis; TV, trichomoniasis) (Footnote: Asterisk marks indicate trichomoniasis with or without other co-infections)

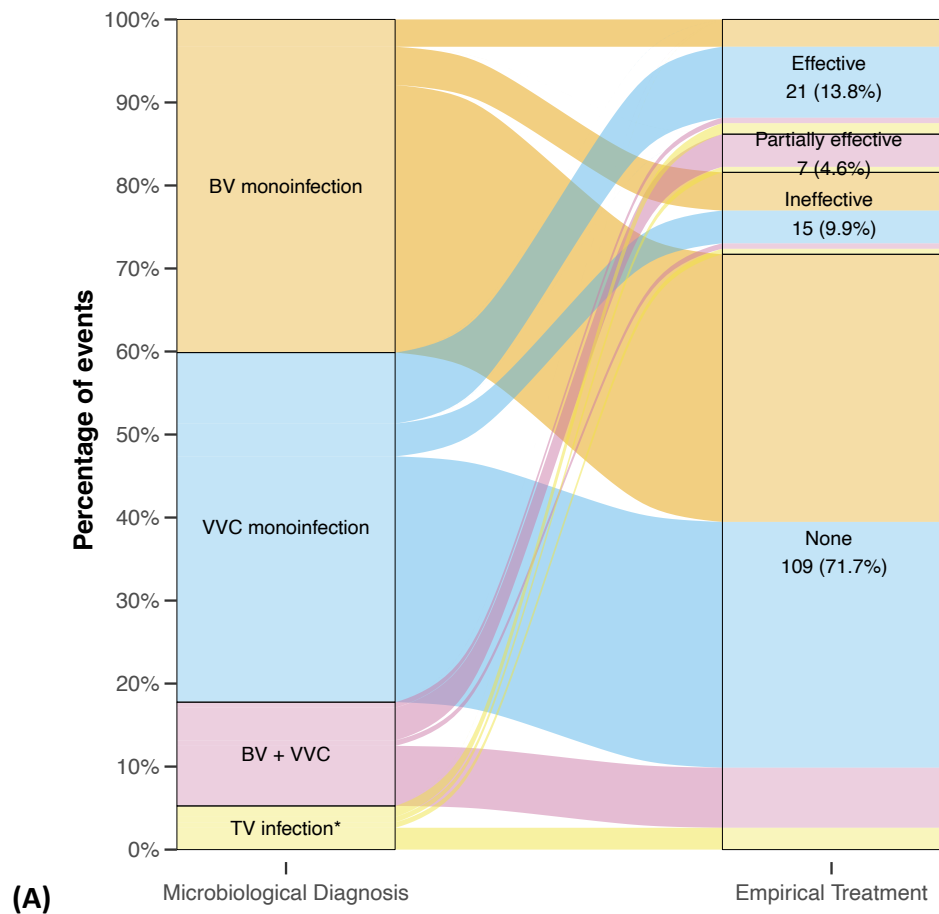

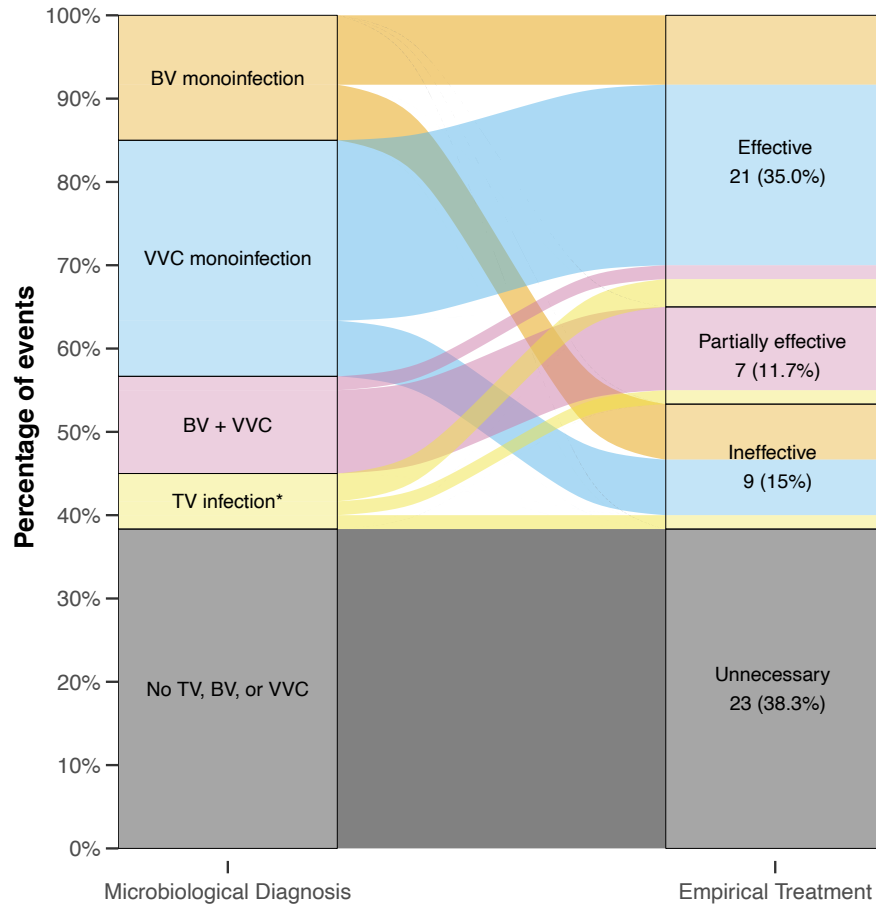

**Supplement Table S1.** Agreement between traditional and molecular diagnostic methods for (A) trichomoniasis, (B) bacterial vaginosis, and (C) vulvovaginal candidiasis. (Tests with invalid multiplex PCR were excluded from the calculation of Cohen’s Kappa.)

(A)

|                        | TV culture negative | TV culture positive | Total |
|------------------------|---------------------|---------------------|-------|
| Multiplex PCR negative | 420                 | 0                   | 420   |
| Multiplex PCR positive | 2                   | 7                   | 9     |
| Multiplex PCR invalid  | 9                   | 0                   | 9     |
| Total                  | 429                 | 7                   | 438   |

Cohen’s Kappa = 0.873 (95% C.I. = 0.698 -1.000)

(B)

|                        | Nugent score |     |      | Total |
|------------------------|--------------|-----|------|-------|
|                        | 0-3          | 4-6 | 7-10 |       |
| Multiplex PCR negative | 183          | 144 | 42   | 369   |
| Multiplex PCR positive | 14           | 16  | 24   | 54    |
| Multiplex PCR invalid  | 9            | 2   | 4    | 15    |
| Total                  | 206          | 162 | 70   | 438   |

Cohen’s Kappa (Nugent  $\geq$  7 and positive PCR) = 0.302 (95% C.I. = 0.180 – 0.424)

(C)

|                        | Microscopy and culture both negative | Microscopy positive and/or culture positive | Total |
|------------------------|--------------------------------------|---------------------------------------------|-------|
| Multiplex PCR negative | 338                                  | 22                                          | 360   |
| Multiplex PCR positive | 14                                   | 55                                          | 69    |
| Multiplex PCR invalid  | 5                                    | 4                                           | 9     |
| Total                  | 357                                  | 81                                          | 438   |

Cohen’s Kappa = 0.703 (95% C.I. = 0.612 – 0.794)

**Supplement Table S2.** Associated factors with trichomoniasis, bacterial vaginosis, and vulvovaginal candidiasis in multivariable analyses with dataset excluding the second enrollment among the participants who were enrolled twice.

|                                              | Trichomoniasis          |                 | Bacterial vaginosis    |                 | Vulvovaginal candidiasis |                  |
|----------------------------------------------|-------------------------|-----------------|------------------------|-----------------|--------------------------|------------------|
|                                              | Adjusted odds ratio     | <i>p</i> -value | Adjusted odds ratio    | <i>p</i> -value | Adjusted odds ratio      | <i>p</i> -value  |
| Age                                          | --                      | --              | --                     | --              | 0.972 (0.937 – 1.008)    | 0.128            |
| Menopausal                                   | --                      | --              | --                     | --              | 0.311 (0.100 – 0.875)    | <b>0.033</b>     |
| History of ectopic pregnancy                 | --                      | --              | 3.096 (0.905 – 10.596) | 0.072           | --                       | --               |
| Multiple sexual partners                     | 13.622 (2.052 – 90.444) | <b>0.007</b>    | 3.989 (1.231 – 12.924) | <b>0.021</b>    | --                       | --               |
| History of vaginal discharge                 | 3.904 (0.722 – 21.101)  | 0.113           | --                     | --              | --                       | --               |
| History of recurrent urinary tract infection | --                      | --              | --                     | --              | 1.797 (0.947 – 3.375)    | 0.070            |
| History of gynecological cancer              | --                      | --              | --                     | --              | 0.481 (0.154 – 1.248)    | 0.163            |
| Vaginal itch                                 | --                      | --              | --                     | --              | 3.375 (1.922 – 5.999)    | <b>&lt;0.001</b> |
| Pelvic pain                                  | --                      | --              | --                     | --              | 0.367 (0.157 – 0.783)    | <b>0.014</b>     |
| Dysuria                                      | 5.471 (1.164 – 25.701)  | <b>0.031</b>    | --                     | --              | --                       | --               |
| Vaginal discharge pH > 4.5                   | --                      | --              | 1.800 (1.038 – 3.122)  | <b>0.036</b>    | --                       | --               |

**Supplement Table S3.** Associated factors with trichomoniasis, bacterial vaginosis, and vulvovaginal candidiasis in multivariable analyses after exclusion of the participants with concurrent pelvic inflammatory disease and urinary tract infection

|                                 | Trichomoniasis          |                 | Bacterial vaginosis    |                 | Vulvovaginal candidiasis |                  |
|---------------------------------|-------------------------|-----------------|------------------------|-----------------|--------------------------|------------------|
|                                 | Adjusted odds ratio     | <i>p</i> -value | Adjusted odds ratio    | <i>p</i> -value | Adjusted odds ratio      | <i>p</i> -value  |
| Menopausal                      | --                      | --              | --                     | --              | 0.137 (0.056 – 0.338)    | <b>&lt;0.001</b> |
| Multiple sexual partners        | 12.466 (1.863 – 83.419) | <b>0.009</b>    | 4.686 (1.347 – 17.006) | <b>0.014</b>    | --                       | --               |
| History of vaginal discharge    | 5.225 (0.999 – 27.329)  | 0.050           | --                     | --              | --                       | --               |
| History of gynecological cancer | --                      | --              | --                     | --              | 0.400 (0.132 – 1.214)    | 0.106            |
| Vaginal itch                    | --                      | --              | --                     | --              | 3.128 (1.801 – 5.432)    | <b>&lt;0.001</b> |
| Pelvic pain                     | --                      | --              | --                     | --              | 0.387 (0.190 – 0.791)    | <b>0.009</b>     |
| Dysuria                         | 5.219 (1.143 – 23.840)  | <b>0.033</b>    | --                     | --              | --                       | --               |
| Vaginal discharge pH > 4.5      | --                      | --              | 2.071 (1.158 – 3.679)  | <b>0.013</b>    | --                       | --               |

**Supplement Table S4.** Factors associated with prescription of empirical antimicrobial treatment among women with vaginitis.

|                                              | Total             | With empirical treatment | No empirical treatment | Univariable <i>p</i> -value | Multivariable <i>p</i> -value |
|----------------------------------------------|-------------------|--------------------------|------------------------|-----------------------------|-------------------------------|
| Age, years                                   | 41.9 (35.9, 52.0) | 42.9 (36.1, 53.2)        | 39.2 (35.4, 47.7)      | <b>0.008</b>                | 0.071                         |
| Marital status                               |                   |                          |                        | 0.329                       |                               |
| Married                                      | 311 (71%)         | 66 (66.7%)               | 245 (72.3%)            |                             |                               |
| Single                                       | 85 (19.4%)        | 20 (20.2%)               | 65 (19.2%)             |                             |                               |
| Widower or divorced                          | 42 (9.6%)         | 13 (13.1%)               | 29 (8.6%)              |                             |                               |
| Smoking                                      | 35 (8%)           | 11 (11.1%)               | 24 (7.1%)              | 0.207                       |                               |
| Alcohol                                      | 34 (7.8%)         | 12 (12.1%)               | 22 (6.5%)              | 0.085                       |                               |
| Douching                                     | 18 (4.1%)         | 7 (7.1%)                 | 11 (3.2%)              | 0.144                       |                               |
| Multiple_partner                             | 18 (4.1%)         | 5 (5.1%)                 | 13 (3.8%)              | 0.571                       |                               |
| History of pregnancy (N = 437)               | 361 (82.6%)       | 80 (80.8%)               | 281 (83.1%)            | 0.651                       |                               |
| Oral contraceptives                          | 23 (5.3%)         | 6 (6.1%)                 | 17 (5%)                | 0.618                       |                               |
| Intrauterine devices                         | 15 (3.4%)         | 9 (9.1%)                 | 6 (1.8%)               | <b>0.002</b>                | <b>&lt;0.001</b>              |
| Recent antibiotics                           | 101 (23.1%)       | 35 (35.4%)               | 66 (19.5%)             | <b>0.002</b>                |                               |
| Gynecological malignancy                     | 52 (11.9%)        | 9 (9.1%)                 | 43 (12.7%)             | 0.381                       |                               |
| History of pelvic inflammatory disease       | 79 (18%)          | 28 (28.3%)               | 51 (15%)               | <b>0.004</b>                |                               |
| History of vaginal discharge syndrome        | 198 (45.2%)       | 65 (65.7%)               | 133 (39.2%)            | <b>&lt;0.001</b>            | <b>0.036</b>                  |
| History of recurrent urinary tract infection | 96 (21.9%)        | 30 (30.3%)               | 66 (19.5%)             | <b>0.027</b>                |                               |
| Fever                                        | 13 (3%)           | 6 (6.1%)                 | 7 (2.1%)               | 0.083                       |                               |
| Pelvic pain                                  | 94 (21.5%)        | 27 (27.3%)               | 67 (19.8%)             | 0.126                       |                               |
| Vaginal itch                                 | 140 (32%)         | 51 (51.5%)               | 89 (26.3%)             | <b>&lt;0.001</b>            | <b>0.028</b>                  |
| Vaginal burning                              | 59 (13.5%)        | 29 (29.3%)               | 30 (8.8%)              | <b>&lt;0.001</b>            | <b>0.003</b>                  |
| Vaginal pain                                 | 50 (11.4%)        | 20 (20.2%)               | 30 (8.8%)              | <b>0.004</b>                |                               |
| Dysuria                                      | 41 (9.4%)         | 20 (20.2%)               | 21 (6.2%)              | <b>&lt;0.001</b>            |                               |
| Dyspareunia                                  | 42 (9.6%)         | 16 (16.2%)               | 26 (7.7%)              | <b>0.018</b>                |                               |

|                                     |             |            |             |              |                  |
|-------------------------------------|-------------|------------|-------------|--------------|------------------|
| Large amount of discharge (N = 366) | 161 (44%)   | 52 (57.8%) | 109 (39.5%) | <b>0.003</b> | 0.099            |
| Discharge color (N = 380)           |             |            |             | 0.116        |                  |
| Clear                               | 104 (27.4%) | 18 (19.6%) | 86 (29.9%)  |              |                  |
| White                               | 167 (43.9%) | 41 (44.6%) | 126 (43.8%) |              |                  |
| Yellow                              | 66 (17.4%)  | 22 (23.9%) | 44 (15.3%)  |              |                  |
| Bloody                              | 43 (11.3%)  | 11 (12%)   | 32 (11.1%)  |              |                  |
| Discharge consistency (N = 378)     |             |            |             | <b>0.001</b> |                  |
| Mucoid                              | 94 (24.9%)  | 15 (16.3%) | 79 (27.6%)  |              | Ref              |
| Watery                              | 162 (42.9%) | 37 (40.2%) | 125 (43.7%) |              | 0.087            |
| Cheesy                              | 16 (4.2%)   | 11 (12%)   | 5 (1.7%)    |              | <b>&lt;0.001</b> |
| Frothy                              | 106 (28%)   | 29 (31.5%) | 77 (26.9%)  |              | 0.052            |
| Odorous smell (N = 384)             | 40 (10.4%)  | 8 (8.5%)   | 32 (11%)    | 0.564        |                  |
| Vaginal pH > 4.5 (N = 339)          | 99 (29.2%)  | 28 (34.6%) | 71 (27.5%)  | 0.262        |                  |
| Cervicitis (N = 432)                | 17 (3.9%)   | 4 (4.1%)   | 13 (3.9%)   | >0.999       |                  |



**Supplement Table S5.** Proportion of participants with microbiologically confirmed VVC according to their menstruation status, presence of vaginal itch, and presence of pelvic pain.

| Menstruation status | Vaginal itch | Pelvic pain | Probability, % (n/N) |
|---------------------|--------------|-------------|----------------------|
| Premenopausal       | Presence     | Absence     | 49.3 (33/67)         |
| Premenopausal       | Absence      | Absence     | 22.9 (40/175)        |
| Premenopausal       | Presence     | Presence    | 21.4 (6/28)          |
| Premenopausal       | Absence      | Presence    | 13.0 (6/46)          |
| Menopausal          | Presence     | Absence     | 14.3 (5/35)          |
| Menopausal          | Absence      | Absence     | 6.0 (4/67)           |
| Menopausal          | Presence     | Presence    | 10.0 (1/10)          |
| Menopausal          | Absence      | Presence    | 0 (0/10)             |
